# Supplementary material for: Semi-Mechanistic Modeling of Florfenicol Time-Kill Curves and in silico Dose Fractionation for Calf Respiratory Pathogens
Source: Front Microbiol. 2019 Jun 11;10:1237. doi: 10.3389/fmicb.2019.01237 (PMC6579883; doi:10.3389/fmicb.2019.01237)
Supplement: Supplementary file 2 [file Table_2.xls]

## Sheet: PM
TAble S2. Raw bacterial count data (CFU/mL) for florfenicol time-kill curves (0 to 24h) for 6 strains of Pasteurella multocida (PM) and Mannheimia haemolytica (MH). The document contains the individual strain MIC in mg/L (measured with 5 overlapping series of doubling dilutions), florfenicol concentration for each curve (mg/L) and the inoculum size (CFU/mL, SLOAD)
bugs	Timecov	ID	KC	MIC	Strain	Time	CFU_0	Dose_in_MIC	Dose_0	Sload_0	MDV_0	CFU_0_25	Dose_0_25	Sload_0_25	MDV_0_25	CFU_0_50	Dose_0_5	Sload_0_5	MDV_0_5	CFU_1	Dose_1	Sload_1	MDV_1	CFU_2	Dose_2	Sload_2	MDV_2	CFU_4	Dose_4	Sload_4	MDV_4
PM	0	1	1	0.4	4121	0	50000000	0	0	50000000	0
PM	1	1	1		4121	1	40000000				0
PM	2	1	1		4121	2	57000000				0
PM	4	1	1		4121	4	100000000				0
PM	8	1	1		4121	8	840000000				0
PM	24	1	1		4121	24	800000000				0
PM	0	1	2	0.4	4121	0		0.25				66000000	0.1	66000000	0
PM	1	1	2		4121	1						65000000			0
PM	2	1	2		4121	2						68000000			0
PM	4	1	2		4121	4						67000000			0
PM	8	1	2		4121	8						6000000000			0
PM	24	1	2		4121	24						5500000000			0
PM	0	1	3	0.4	4121	0		0.5								69000000	0.2	69000000	0
PM	1	1	3		4121	1										60000000			0
PM	2	1	3		4121	2										65000000			0
PM	4	1	3		4121	4										66000000			0
PM	8	1	3		4121	8										6000000000			0
PM	24	1	3		4121	24										4000000000			0
PM	0	1	4	0.4	4121	0		1												54000000	0.4	54000000	0
PM	1	1	4		4121	1														30000000			0
PM	2	1	4		4121	2														25000000			0
PM	4	1	4		4121	4														10000000			0
PM	8	1	4		4121	8														7000000			0
PM	24	1	4		4121	24														8000000			0
PM	0	1	5	0.4	4121	0		2																50000000	0.8	50000000	0
PM	1	1	5		4121	1																		20000000			0
PM	2	1	5		4121	2																		1000000			0
PM	4	1	5		4121	4																		400000			0
PM	8	1	5		4121	8																		7000			0
PM	24	1	5		4121	24																		600			0
PM	0	1	6	0.4	4121	0		4																				50000000	1.6	50000000	0
PM	1	1	6		4121	1																						20000000			0
PM	2	1	6		4121	2																						700000			0
PM	4	1	6		4121	4																						300000			0
PM	8	1	6		4121	8																						4000			0
PM	24	1	6		4121	24																						600			0
PM	0	2	1	0.4	4323	0	20000000	0	0	20000000	0
PM	1	2	1		4323	1	17000000				0
PM	2	2	1		4323	2	38000000				0
PM	4	2	1		4323	4	60000000				0
PM	8	2	1		4323	8	2000000000				0
PM	24	2	1		4323	24	1000000000				0
PM	0	2	2	0.4	4323	0		0.25				16000000	0.1	16000000	0
PM	1	2	2		4323	1						16000000			0
PM	2	2	2		4323	2						38000000			0
PM	4	2	2		4323	4						60000000			0
PM	8	2	2		4323	8						2000000000			0
PM	24	2	2		4323	24						1000000000			0
PM	0	2	3	0.4	4323	0		0.5								22000000	0.2	22000000	0
PM	1	2	3		4323	1										16000000			0
PM	2	2	3		4323	2										35000000			0
PM	4	2	3		4323	4										56000000			0
PM	8	2	3		4323	8										1600000000			0
PM	24	2	3		4323	24										1000000000			0
PM	0	2	4	0.4	4323	0		1												20000000	0.4	20000000	0
PM	1	2	4		4323	1														16000000			0
PM	2	2	4		4323	2														10000000			0
PM	4	2	4		4323	4														1000000			0
PM	8	2	4		4323	8														1000000			0
PM	24	2	4		4323	24														3000000			0
PM	0	2	5	0.4	4323	0		2																21000000	0.8	21000000	0
PM	1	2	5		4323	1																		11000000			0
PM	2	2	5		4323	2																		500000			0
PM	4	2	5		4323	4																		200000			0
PM	8	2	5		4323	8																		600			0
PM	24	2	5		4323	24																		8000			0
PM	0	2	6	0.4	4323	0		4																				22000000	1.6	22000000	0
PM	1	2	6		4323	1																						10000000			0
PM	2	2	6		4323	2																						400000			0
PM	4	2	6		4323	4																						100000			0
PM	8	2	6		4323	8																						200			0
PM	24	2	6		4323	24																						4000			0
PM	0	3	1	0.4	4072	0	45000000	0	0	45000000	0
PM	1	3	1		4072	1	50000000				0
PM	2	3	1		4072	2	70000000				0
PM	4	3	1		4072	4	80000000				0
PM	8	3	1		4072	8	7000000000				0
PM	24	3	1		4072	24	1000000000				0
PM	0	3	2	0.4	4072	0		0.25				45000000	0.1	45000000	0
PM	1	3	2		4072	1						46000000			0
PM	2	3	2		4072	2						52000000			0
PM	4	3	2		4072	4						60000000			0
PM	8	3	2		4072	8						5200000000			0
PM	24	3	2		4072	24						5000000000			0
PM	0	3	3	0.4	4072	0		0.5								40000000	0.2	40000000	0
PM	1	3	3		4072	1										50000000			0
PM	2	3	3		4072	2										52000000			0
PM	4	3	3		4072	4										60000000			0
PM	8	3	3		4072	8										3400000000			0
PM	24	3	3		4072	24										4000000000			0
PM	0	3	4	0.4	4072	0		1												40000000	0.4	40000000	0
PM	1	3	4		4072	1														40000000			0
PM	2	3	4		4072	2														30000000			0
PM	4	3	4		4072	4														7000000			0
PM	8	3	4		4072	8														2300000			0
PM	24	3	4		4072	24														6000000			0
PM	0	3	5	0.4	4072	0		2																44000000	0.8	44000000	0
PM	1	3	5		4072	1																		20000000			0
PM	2	3	5		4072	2																		800000			0
PM	4	3	5		4072	4																		400000			0
PM	8	3	5		4072	8																		320			0
PM	24	3	5		4072	24																		5000			0
PM	0	3	6	0.4	4072	0		4																				40000000	1.6	40000000	0
PM	1	3	6		4072	1																						10000000			0
PM	2	3	6		4072	2																						660000			0
PM	4	3	6		4072	4																						180000			0
PM	8	3	6		4072	8																						100			0
PM	24	3	6		4072	24																						2000			0
PM	0	4	1	0.45	4096	0	240000000	0	0	240000000	0
PM	1	4	1		4096	1	140000000				0
PM	2	4	1		4096	2	400000000				0
PM	4	4	1		4096	4	550000000				0
PM	8	4	1		4096	8	9000000000				0
PM	24	4	1		4096	24	9000000000				0
PM	0	4	2	0.45	4096	0		0.25				240000000	0.1125	240000000	0
PM	1	4	2		4096	1						120000000			0
PM	2	4	2		4096	2						400000000			0
PM	4	4	2		4096	4						500000000			0
PM	8	4	2		4096	8						8500000000			0
PM	24	4	2		4096	24						7000000000			0
PM	0	4	3	0.45	4096	0		0.5								250000000	0.225	250000000	0
PM	1	4	3		4096	1										120000000			0
PM	2	4	3		4096	2										400000000			0
PM	4	4	3		4096	4										500000000			0
PM	8	4	3		4096	8										8500000000			0
PM	24	4	3		4096	24										8000000000			0
PM	0	4	4	0.45	4096	0		1												220000000	0.45	220000000	0
PM	1	4	4		4096	1														100000000			0
PM	2	4	4		4096	2														100000000			0
PM	4	4	4		4096	4														100000000			0
PM	8	4	4		4096	8														60000000			0
PM	24	4	4		4096	24														90000000			0
PM	0	4	5	0.45	4096	0		2																250000000	0.9	250000000	0
PM	1	4	5		4096	1																		90000000			0
PM	2	4	5		4096	2																		6200000			0
PM	4	4	5		4096	4																		4000000			0
PM	8	4	5		4096	8																		1000			0
PM	24	4	5		4096	24																		60000			0
PM	0	4	6	0.45	4096	0		4																				240000000	1.8	240000000	0
PM	1	4	6		4096	1																						74000000			0
PM	2	4	6		4096	2																						4000000			0
PM	4	4	6		4096	4																						2000000			0
PM	8	4	6		4096	8																						500			0
PM	24	4	6		4096	24																						10000			0
PM	0	5	1	0.35	3722	0	29000000	0	0	29000000	0
PM	1	5	1		3722	1	25000000				0
PM	2	5	1		3722	2	32000000				0
PM	4	5	1		3722	4	70000000				0
PM	8	5	1		3722	8	5000000000				0
PM	24	5	1		3722	24	4000000000				0
PM	0	5	2	0.35	3722	0		0.25				25000000	0.0875	25000000	0
PM	1	5	2		3722	1						24000000			0
PM	2	5	2		3722	2						32000000			0
PM	4	5	2		3722	4						65000000			0
PM	8	5	2		3722	8						3500000000			0
PM	24	5	2		3722	24						2700000000			0
PM	0	5	3	0.35	3722	0		0.5								28000000	0.175	28000000	0
PM	1	5	3		3722	1										24000000			0
PM	2	5	3		3722	2										32000000			0
PM	4	5	3		3722	4										60000000			0
PM	8	5	3		3722	8										3000000000			0
PM	24	5	3		3722	24										2000000000			0
PM	0	5	4	0.35	3722	0		1												26000000	0.35	26000000	0
PM	1	5	4		3722	1														24000000			0
PM	2	5	4		3722	2														20000000			0
PM	4	5	4		3722	4														8000000			0
PM	8	5	4		3722	8														6000000			0
PM	24	5	4		3722	24														6000000			0
PM	0	5	5	0.35	3722	0		2																28000000	0.7	28000000	0
PM	1	5	5		3722	1																		20000000			0
PM	2	5	5		3722	2																		3000000			0
PM	4	5	5		3722	4																		100000			0
PM	8	5	5		3722	8																		800			0
PM	24	5	5		3722	24																		800			0
PM	0	5	6	0.35	3722	0		4																				26000000	1.4	26000000	0
PM	1	5	6		3722	1																						20000000			0
PM	2	5	6		3722	2																						2600000			0
PM	4	5	6		3722	4																						200000			0
PM	8	5	6		3722	8																						400			0
PM	24	5	6		3722	24																						260			0
PM	0	6	1	0.35	3979	0	50000000	0	0	50000000	0
PM	1	6	1		3979	1	40000000				0
PM	2	6	1		3979	2	57000000				0
PM	4	6	1		3979	4	100000000				0
PM	8	6	1		3979	8	840000000				0
PM	24	6	1		3979	24	800000000				0
PM	0	6	2	0.35	3979	0		0.25				50000000	0.0875	50000000	0
PM	1	6	2		3979	1						35000000			0
PM	2	6	2		3979	2						42000000			0
PM	4	6	2		3979	4						80000000			0
PM	8	6	2		3979	8						740000000			0
PM	24	6	2		3979	24						700000000			0
PM	0	6	3	0.35	3979	0		0.5								55000000	0.175	55000000	0
PM	1	6	3		3979	1										40000000			0
PM	2	6	3		3979	2										42000000			0
PM	4	6	3		3979	4										77000000			0
PM	8	6	3		3979	8										600000000			0
PM	24	6	3		3979	24										650000000			0
PM	0	6	4	0.35	3979	0		1												54000000	0.35	54000000	0
PM	1	6	4		3979	1														30000000			0
PM	2	6	4		3979	2														25000000			0
PM	4	6	4		3979	4														10000000			0
PM	8	6	4		3979	8														7000000			0
PM	24	6	4		3979	24														8000000			0
PM	0	6	5	0.35	3979	0		2																50000000	0.7	50000000	0
PM	1	6	5		3979	1																		20000000			0
PM	2	6	5		3979	2																		1000000			0
PM	4	6	5		3979	4																		400000			0
PM	8	6	5		3979	8																		7000			0
PM	24	6	5		3979	24																		600			0
PM	0	6	6	0.35	3979	0		4																				50000000	1.4	50000000	0
PM	1	6	6		3979	1																						20000000			0
PM	2	6	6		3979	2																						700000			0
PM	4	6	6		3979	4																						300000			0
PM	8	6	6		3979	8																						4000			0
PM	24	6	6		3979	24																						600			0

## Sheet: MH
bugs	TimeCov	ID	KC	MIC	Strain	Time	CFU_0	Dose_in_MIC	Dose_0	Sload_0	MDV_0	CFU_0_25	Dose_0_25	Sload_0_25	MDV_0_25	CFU_0_50	Dose_0_5	Sload_0_5	MDV_0_5	CFU_1	Dose_1	Sload_1	MDV_1	CFU_2	Dose_2	Sload_2	MDV_2	CFU_4	Dose_4	Sload_4	MDV_4
MH	0	1	1	0.55	1250	0	6000000	0	0	6000000	0
MH	1	1	1		1250	1	6700000				0
MH	2	1	1		1250	2	12000000				0
MH	4	1	1		1250	4	50000000				0
MH	8	1	1		1250	8	100000000				0
MH	24	1	1		1250	24	90000000				0
MH	0	1	2	0.55	1250	0		0.25				6500000	0.1375	6500000	0
MH	1	1	2		1250	1						6500000			0
MH	2	1	2		1250	2						10000000			0
MH	4	1	2		1250	4						50000000			0
MH	8	1	2		1250	8						90000000			0
MH	24	1	2		1250	24						90000000			0
MH	0	1	3	0.55	1250	0		0.5								7000000	0.275	7000000	0
MH	1	1	3		1250	1										6000000			0
MH	2	1	3		1250	2										9000000			0
MH	4	1	3		1250	4										9000000			0
MH	8	1	3		1250	8										10000000			0
MH	24	1	3		1250	24										10000000			0
MH	0	1	4	0.55	1250	0		1												6000000	0.55	6000000	0
MH	1	1	4		1250	1														6000000			0
MH	2	1	4		1250	2														4000000			0
MH	4	1	4		1250	4														4000000			0
MH	8	1	4		1250	8														2000000			0
MH	24	1	4		1250	24														2000000			0
MH	0	1	5	0.55	1250	0		2																5000000	1.1	5000000	0
MH	1	1	5		1250	1																		2700000			0
MH	2	1	5		1250	2																		600000			0
MH	4	1	5		1250	4																		40000			0
MH	8	1	5		1250	8																		1000			0
MH	24	1	5		1250	24																		30			1
MH	0	1	6	0.55	1250	0		4																				7500000	2.2	7500000	0
MH	1	1	6		1250	1																						1000000			0
MH	2	1	6		1250	2																						140000			0
MH	4	1	6		1250	4																						12000			0
MH	8	1	6		1250	8																						400			0
MH	24	1	6		1250	24																						30			1
MH	0	2	1	0.5	2059	0	10000000	0	0	10000000	0
MH	1	2	1		2059	1	9000000				0
MH	2	2	1		2059	2	12000000				0
MH	4	2	1		2059	4	60000000				0
MH	8	2	1		2059	8	770000000				0
MH	24	2	1		2059	24	700000000				0
MH	0	2	2	0.5	2059	0		0.25				15000000	0.125	15000000	0
MH	1	2	2		2059	1						14000000			0
MH	2	2	2		2059	2						20000000			0
MH	4	2	2		2059	4						50000000			0
MH	8	2	2		2059	8						500000000			0
MH	24	2	2		2059	24						700000000			0
MH	0	2	3	0.5	2059	0		0.5								20000000	0.25	20000000	0
MH	1	2	3		2059	1										17000000			0
MH	2	2	3		2059	2										19000000			0
MH	4	2	3		2059	4										20000000			0
MH	8	2	3		2059	8										90000000			0
MH	24	2	3		2059	24										100000000			0
MH	0	2	4	0.5	2059	0		1												10000000	0.5	10000000	0
MH	1	2	4		2059	1														10000000			0
MH	2	2	4		2059	2														9000000			0
MH	4	2	4		2059	4														6000000			0
MH	8	2	4		2059	8														4600000			0
MH	24	2	4		2059	24														4000000			0
MH	0	2	5	0.5	2059	0		2																17000000	4118	17000000	0
MH	1	2	5		2059	1																		8500000			0
MH	2	2	5		2059	2																		600000			0
MH	4	2	5		2059	4																		60000			0
MH	8	2	5		2059	8																		2000			0
MH	24	2	5		2059	24																		200			0
MH	0	2	6	0.5	2059	0		4																				20000000	2	20000000	0
MH	1	2	6		2059	1																						1500000			0
MH	2	2	6		2059	2																						40000			0
MH	4	2	6		2059	4																						3000			0
MH	8	2	6		2059	8																						30			1
MH	24	2	6		2059	24																						30			1
MH	0	3	1	0.5	2653	0	40000000	0	0	40000000	0
MH	1	3	1		2653	1	30000000				0
MH	2	3	1		2653	2	50000000				0
MH	4	3	1		2653	4	70000000				0
MH	8	3	1		2653	8	700000000				0
MH	24	3	1		2653	24	800000000				0
MH	0	3	2	0.5	2653	0		0.25				40000000	0.125	40000000	0
MH	1	3	2		2653	1						35000000			0
MH	2	3	2		2653	2						50000000			0
MH	4	3	2		2653	4						50000000			0
MH	8	3	2		2653	8						600000000			0
MH	24	3	2		2653	24						700000000			0
MH	0	3	3	0.5	2653	0		0.5								20000000	0.25	20000000	0
MH	1	3	3		2653	1										20000000			0
MH	2	3	3		2653	2										40000000			0
MH	4	3	3		2653	4										40000000			0
MH	8	3	3		2653	8										400000000			0
MH	24	3	3		2653	24										300000000			0
MH	0	3	4	0.5	2653	0		1												25000000	0.5	25000000	0
MH	1	3	4		2653	1														20000000			0
MH	2	3	4		2653	2														10000000			0
MH	4	3	4		2653	4														7800000			0
MH	8	3	4		2653	8														6000000			0
MH	24	3	4		2653	24														3000000			0
MH	0	3	5	0.5	2653	0		2																40000000	1	40000000	0
MH	1	3	5		2653	1																		10000000			0
MH	2	3	5		2653	2																		100000			0
MH	4	3	5		2653	4																		14000			0
MH	8	3	5		2653	8																		400			0
MH	24	3	5		2653	24																		30			1
MH	0	3	6	0.5	2653	0		4																				40000000	2	40000000	0
MH	1	3	6		2653	1																						3000000			0
MH	2	3	6		2653	2																						70000			0
MH	4	3	6		2653	4																						1000			0
MH	8	3	6		2653	8																						30			1
MH	24	3	6		2653	24																						30			1
MH	0	4	1	0.5	1056	0	55000000	0	0	55000000	0
MH	1	4	1		1056	1	63000000				0
MH	2	4	1		1056	2	100000000				0
MH	4	4	1		1056	4	800000000				0
MH	8	4	1		1056	8	1000000000				0
MH	24	4	1		1056	24	5000000000				0
MH	0	4	2	0.5	1056	0		0.25				40000000	0.125	40000000	0
MH	1	4	2		1056	1						57000000			0
MH	2	4	2		1056	2						100000000			0
MH	4	4	2		1056	4						600000000			0
MH	8	4	2		1056	8						900000000			0
MH	24	4	2		1056	24						4000000000			0
MH	0	4	3	0.5	1056	0		0.5								50000000	0.25	50000000	0
MH	1	4	3		1056	1										60000000			0
MH	2	4	3		1056	2										100000000			0
MH	4	4	3		1056	4										700000000			0
MH	8	4	3		1056	8										700000000			0
MH	24	4	3		1056	24										4000000000			0
MH	0	4	4	0.5	1056	0		1												50000000	0.5	50000000	0
MH	1	4	4		1056	1														46000000			0
MH	2	4	4		1056	2														20000000			0
MH	4	4	4		1056	4														10000000			0
MH	8	4	4		1056	8														7000000			0
MH	24	4	4		1056	24														5000000			0
MH	0	4	5	0.5	1056	0		2																45000000	1	45000000	0
MH	1	4	5		1056	1																		6000000			0
MH	2	4	5		1056	2																		200000			0
MH	4	4	5		1056	4																		40000			0
MH	8	4	5		1056	8																		100			0
MH	24	4	5		1056	24																		30			1
MH	0	4	6	0.5	1056	0		4																				36000000	2	36000000	0
MH	1	4	6		1056	1																						1000000			0
MH	2	4	6		1056	2																						60000			0
MH	4	4	6		1056	4																						10000			0
MH	8	4	6		1056	8																						30			1
MH	24	4	6		1056	24																						30			1
MH	0	5	1	0.5	2008	0	15000000	0	0	15000000	0
MH	1	5	1		2008	1	10000000				0
MH	2	5	1		2008	2	40000000				0
MH	4	5	1		2008	4	500000000				0
MH	8	5	1		2008	8	7300000000				0
MH	24	5	1		2008	24	8000000000				0
MH	0	5	2	0.5	2008	0		0.25				10000000	0.125	10000000	0
MH	1	5	2		2008	1						13000000			0
MH	2	5	2		2008	2						50000000			0
MH	4	5	2		2008	4						500000000			0
MH	8	5	2		2008	8						3000000000			0
MH	24	5	2		2008	24						7000000000			0
MH	0	5	3	0.5	2008	0		0.5								15000000	0.25	15000000	0
MH	1	5	3		2008	1										10000000			0
MH	2	5	3		2008	2										40000000			0
MH	4	5	3		2008	4										300000000			0
MH	8	5	3		2008	8										1000000000			0
MH	24	5	3		2008	24										2000000000			0
MH	0	5	4	0.5	2008	0		1												10000000	0.5	10000000	0
MH	1	5	4		2008	1														10000000			0
MH	2	5	4		2008	2														8000000			0
MH	4	5	4		2008	4														6000000			0
MH	8	5	4		2008	8														1000000			0
MH	24	5	4		2008	24														1000000			0
MH	0	5	5	0.5	2008	0		2																16000000	1	16000000	0
MH	1	5	5		2008	1																		10000000			0
MH	2	5	5		2008	2																		1000000			0
MH	4	5	5		2008	4																		65000			0
MH	8	5	5		2008	8																		800			0
MH	24	5	5		2008	24																		30			1
MH	0	5	6	0.5	2008	0		4																				12000000	2	12000000	0
MH	1	5	6		2008	1																						4000000			0
MH	2	5	6		2008	2																						90000			0
MH	4	5	6		2008	4																						10000			0
MH	8	5	6		2008	8																						30			1
MH	24	5	6		2008	24																						30			1
MH	0	6	1	0.55	1978	0	22000000	0	0	22000000	0
MH	1	6	1		1978	1	20000000				0
MH	2	6	1		1978	2	40000000				0
MH	4	6	1		1978	4	90000000				0
MH	8	6	1		1978	8	6000000000				0
MH	24	6	1		1978	24	5000000000				0
MH	0	6	2	0.55	1978	0		0.25				20000000	0.1375	20000000	0
MH	1	6	2		1978	1						20000000			0
MH	2	6	2		1978	2						26000000			0
MH	4	6	2		1978	4						84000000			0
MH	8	6	2		1978	8						7000000000			0
MH	24	6	2		1978	24						6000000000			0
MH	0	6	3	0.55	1978	0		0.5								24000000	0.275	24000000	0
MH	1	6	3		1978	1										15000000			0
MH	2	6	3		1978	2										30000000			0
MH	4	6	3		1978	4										72000000			0
MH	8	6	3		1978	8										3000000000			0
MH	24	6	3		1978	24										700000000			0
MH	0	6	4	0.55	1978	0		1												22000000	0.55	22000000	0
MH	1	6	4		1978	1														10000000			0
MH	2	6	4		1978	2														10000000			0
MH	4	6	4		1978	4														7000000			0
MH	8	6	4		1978	8														5400000			0
MH	24	6	4		1978	24														2000000			0
MH	0	6	5	0.55	1978	0		2																20000000	1.1	20000000	0
MH	1	6	5		1978	1																		10000000			0
MH	2	6	5		1978	2																		4000000			0
MH	4	6	5		1978	4																		500000			0
MH	8	6	5		1978	8																		1600			0
MH	24	6	5		1978	24																		30			1
MH	0	6	6	0.55	1978	0		4																				22000000	2.2	22000000	0
MH	1	6	6		1978	1																						6000000			0
MH	2	6	6		1978	2																						1300000			0
MH	4	6	6		1978	4																						75000			0
MH	8	6	6		1978	8																						200			0
MH	24	6	6		1978	24																						30			1
